# Supplementary material for: Straightforward supramolecular purification of C84 from a fullerene extract
Source: Royal Society of Chemistry journal article supplement (doi:10.1039/d1qo00597a), 2021-01-01
Supplement: d1qo00597a1.xlsx [file d1qo00597a1.xlsx]

## Sheet: Hoja1
Host concentration / M	Guest concentration / M	420
8.3e-07	0	0.184528
8.3e-07	6.0791e-07	0.173638
8.3e-07	8.04264e-07	0.172429
8.3e-07	1.18798e-06	0.168727
8.3e-07	1.56015e-06	0.168514
8.3e-07	1.9213e-06	0.168064
