# Supplementary material for: Straightforward supramolecular purification of C84 from a fullerene extract
Source: Royal Society of Chemistry journal article supplement (doi:10.1039/d1qo00597a), 2021-01-01
Supplement: d1qo00597a2.xlsx [file d1qo00597a2.xlsx]

## Sheet: Hoja1
Host concentration / M	[guest]	Abs 420 nm
8.3e-07	0	0.372305
8.3e-07	1.07639e-07	0.238447
8.3e-07	2.13583e-07	0.217913
8.3e-07	3.17871e-07	0.204685
8.3e-07	4.20543e-07	0.199871
8.3e-07	5.21635e-07	0.19644
8.3e-07	6.21183e-07	0.194283
8.3e-07	7.19223e-07	0.193206
8.3e-07	8.15789e-07	0.193567
8.3e-07	1.00463e-06	0.19478
8.3e-07	1.18796e-06	0.194679
