# Supplementary material for: Straightforward supramolecular purification of C84 from a fullerene extract
Source: Royal Society of Chemistry journal article supplement (doi:10.1039/d1qo00597a), 2021-01-01
Supplement: d1qo00597a3.xlsx [file d1qo00597a3.xlsx]

## Sheet: Hoja1
Host concentration / M	Guest concentration / M	420
8.3e-07	0	0.367703
8.3e-07	0	0.345022
8.3e-07	2.05853e-07	0.305977
8.3e-07	4.08465e-07	0.288273
8.3e-07	6.0791e-07	0.273725
8.3e-07	8.04264e-07	0.251921
8.3e-07	9.97596e-07	0.228704
8.3e-07	1.18798e-06	0.204967
8.3e-07	1.37547e-06	0.190009
8.3e-07	1.56015e-06	0.174242
8.3e-07	1.74207e-06	0.160534
8.3e-07	1.9213e-06	0.152646
8.3e-07	2.09789e-06	0.144655
8.3e-07	2.2719e-06	0.139485
8.3e-07	2.44339e-06	0.134688
8.3e-07	2.61241e-06	0.131389
8.3e-07	2.77902e-06	0.128798
8.3e-07	2.94326e-06	0.126829
8.3e-07	3.26486e-06	0.126843
8.3e-07	3.57759e-06	0.126167
8.3e-07	3.8818e-06	0.126938
