# Supplementary material for: Straightforward supramolecular purification of C84 from a fullerene extract
Source: Royal Society of Chemistry journal article supplement (doi:10.1039/d1qo00597a), 2021-01-01
Supplement: d1qo00597a4.xlsx [file d1qo00597a4.xlsx]

## Sheet: Hoja1
Host concentration / M	Guest concentration / M	420
8.3e-07	0	0.311956
8.3e-07	2.05853e-07	0.292871
8.3e-07	4.08465e-07	0.282676
8.3e-07	6.0791e-07	0.272023
8.3e-07	8.04264e-07	0.259738
8.3e-07	1.18798e-06	0.245324
8.3e-07	1.56015e-06	0.236259
8.3e-07	1.9213e-06	0.228131
8.3e-07	2.2719e-06	0.22103
8.3e-07	2.94326e-06	0.215156
8.3e-07	3.57759e-06	0.209451
8.3e-07	4.17785e-06	0.206016
8.3e-07	4.74673e-06	0.202908
