# Supplementary material for: Straightforward supramolecular purification of C84 from a fullerene extract
Source: Royal Society of Chemistry journal article supplement (doi:10.1039/d1qo00597a), 2021-01-01
Supplement: d1qo00597a5.xlsx [file d1qo00597a5.xlsx]

## Sheet: Hoja1
Host concentration / M	[guest]	Abs 420 nm
4.34e-07	0	0.282861
4.34e-07	1.07639e-07	0.221106
4.34e-07	2.13583e-07	0.194209
4.34e-07	3.17871e-07	0.18483
4.34e-07	4.20543e-07	0.177027
4.34e-07	5.21635e-07	0.16982
4.34e-07	6.21183e-07	0.166619
4.34e-07	7.19223e-07	0.163533
4.34e-07	8.15789e-07	0.157746
4.34e-07	1.00463e-06	0.15121
4.34e-07	1.18796e-06	0.151249
4.34e-07	1.36601e-06	0.148874
4.34e-07	1.53901e-06	0.146661
