# Supplementary material for: Straightforward supramolecular purification of C84 from a fullerene extract
Source: Royal Society of Chemistry journal article supplement (doi:10.1039/d1qo00597a), 2021-01-01
Supplement: d1qo00597a6.xlsx [file d1qo00597a6.xlsx]

## Sheet: Hoja1
Host concentration / M	[guest]	Abs 420 nm
4.34e-07	0	0.146463
4.34e-07	1.07639e-07	0.125574
4.34e-07	2.13583e-07	0.114179
4.34e-07	3.17871e-07	0.108231
4.34e-07	4.20543e-07	0.102384
4.34e-07	5.21635e-07	0.0981758
4.34e-07	7.19223e-07	0.0921144
4.34e-07	9.10914e-07	0.0891019
4.34e-07	1.09697e-06	0.0882674
4.34e-07	1.27763e-06	0.087706
4.34e-07	1.62368e-06	0.0891373
4.34e-07	1.95077e-06	0.0889064
