# Supplementary material for: Straightforward supramolecular purification of C84 from a fullerene extract
Source: Royal Society of Chemistry journal article supplement (doi:10.1039/d1qo00597a), 2021-01-01
Supplement: d1qo00597a7.xlsx [file d1qo00597a7.xlsx]

## Sheet: Hoja1
Host concentration / M	Guest concentration / M	420
8.3e-07	0	0.377701
8.3e-07	1.4881e-07	0.361722
8.3e-07	2.95276e-07	0.357659
8.3e-07	4.39453e-07	0.349485
8.3e-07	5.81395e-07	0.341102
8.3e-07	7.21154e-07	0.336609
8.3e-07	6.94444e-07	0.321121
8.3e-07	9.58029e-07	0.319154
8.3e-07	1.46277e-06	0.3176
8.3e-07	1.93966e-06	0.311066
8.3e-07	2.39094e-06	0.311574
