# Supplementary material for: Straightforward supramolecular purification of C84 from a fullerene extract
Source: Royal Society of Chemistry journal article supplement (doi:10.1039/d1qo00597a), 2021-01-01
Supplement: d1qo00597a8.xlsx [file d1qo00597a8.xlsx]

## Sheet: Hoja1
Host concentration / M	Guest concentration / M	420
8.3e-07	0	0.343009
8.3e-07	1.4881e-07	0.320034
8.3e-07	2.95276e-07	0.30347
8.3e-07	4.39453e-07	0.294609
8.3e-07	5.81395e-07	0.285141
8.3e-07	8.58779e-07	0.276046
8.3e-07	1.12782e-06	0.269114
8.3e-07	1.38889e-06	0.262461
8.3e-07	1.64234e-06	0.257612
8.3e-07	1.88849e-06	0.255504
8.3e-07	2.39362e-06	0.251026
8.3e-07	2.84483e-06	0.250268
8.3e-07	3.27181e-06	0.246647
